# Supplementary material for: Two novel chiral tetranucleate copper-based complexes: syntheses, crystal structures, inhibition of angiogenesis and the growth of human breast cancerin vitroandin vivo
Source: Royal Society of Chemistry journal article supplement (doi:10.1039/d1dt02033a), 2021-01-01
Supplement: d1dt02033a1.pdf [file d1dt02033a1.pdf]

## Supporting Information

### Two Novel Chiral Tetranucleate Copper-based Complexes: Syntheses, Crystal Structures, Inhibiting Angiogenesis and the Growth of Human Breast Cancer in Vitro and Vivo

Xiao-Xiao Hou,<sup>† a</sup> Ya-Ping Ren,<sup>† a</sup> Zhao-Hui Luo,<sup>a</sup> Bing-Li Jiang,<sup>a</sup> Tian-Tian Lu,<sup>a</sup> Fu-Ping Huang,<sup>b</sup>  
and Xiu-Ying Qin<sup>\*a,b</sup>

#### Instruments and materials

**Materials.** All materials and solvents were purchased commercially and used without further purification unless specifically noted. Ultrapure Milli-Q water was used in all experiments. O-vanillin and 3,5-Di-tert-butylsalicylaldehyde reagents were purchased from SAAN Chemical Technology Co., Ltd. *L*-Methioninol was purchased from Sequoia precision Chemical Co., Ltd. Potassium hydroxide(A.R.), Anhydrous methanol and ethanol(A.R.) and Copper nitrate trihydrate (A.R.) were purchased from Xilong Science Co., Ltd. MTT, penicillin/streptomycin, and dimethylsulfoxide was purchased from Sigma-Aldrich, USA. Dulbecco's modified eagle medium (DMEM, Gibco), Fetal bovine serum (FBS, GEMINI), pancreatic enzyme(Gibco), cell culture plates(Corning) were used. Annexin V/PI apoptosis kit was purchased from BD Bioscience. The JC-1 mitochondrial membrane potential detection kit was from Beyotime (Shanghai, China). HUVECs and MDA-MB-231 cell lines were purchased from Shanghai oulu biological technology Co, ltd. Cell culture: HUVECs were cultured in DMEM medium supplemented with FBS(10%), penicillin(100 µg/mL), and streptomycin (100 µg/mL); MDA-MB-231 cells were cultured in DMEM medium supplemented with FBS(15%), penicillin (100 µg/mL), and streptomycin (100 µg/mL). They were incubated at 37°C in a humidified incubator with 5 % CO<sub>2</sub> and 95 % air, and the medium was changed thrice weekly. Matrigel was purchased from Corning.

**Instruments.** IR spectras were taken on a IRAffinity-1 FT-IR spectrometer with KBr pallets in the range of 4000~400 cm<sup>-1</sup>. The crystal structures were determined by a four-circle CCD diffractometer (SuperNova, Single source at offset, Eos). Mass spectra were recorded on a Liquid Chromatography Mass Spectrometry (Exactive, Thermo Fisher Scientific) with DMSO as solvent and CH<sub>3</sub>CH<sub>2</sub>OH diluent. C, H, and N elemental analyses were performed using a PerkinElmer 2400 II elemental analyzer. The ICP –MS (Inductively coupled plasma mass spectrometry) data were recorded using a FLexar-NexION300X inductively coupled plasma OES spectrometer. Apoptosis assays and mitochondrial membrane potential detection were determined by BD FACSCanto. The animal experiments were approved by the Institutional Animal Care and Use Committee of Guilin

Medical University. Cells were cultured in a CO<sub>2</sub> incubator (170S, Galaxy, New Brunswick). Cells were observed with a inverted microscope (OLYMPUS CKX35, Japan).

## Supporting Tables

Table S1. Crystal data and structure refinement parameters for TNCu-A and TNCu-B.

| Parameters                                                                                         | TNCu-A                                                                                                                                                                                                                                                                                                           | TNCu-B                                                                                                                                                                                                                                                                                                          |
|----------------------------------------------------------------------------------------------------|------------------------------------------------------------------------------------------------------------------------------------------------------------------------------------------------------------------------------------------------------------------------------------------------------------------|-----------------------------------------------------------------------------------------------------------------------------------------------------------------------------------------------------------------------------------------------------------------------------------------------------------------|
| Empirical formula                                                                                  | C <sub>52</sub> H <sub>68</sub> Cu <sub>4</sub> N <sub>4</sub> O <sub>12</sub> S <sub>4</sub>                                                                                                                                                                                                                    | C <sub>80</sub> H <sub>124</sub> Cu <sub>4</sub> N <sub>4</sub> O <sub>8</sub> S <sub>4</sub>                                                                                                                                                                                                                   |
| Formula moiety                                                                                     | 2(C <sub>26</sub> H <sub>34</sub> Cu <sub>2</sub> N <sub>2</sub> O <sub>6</sub> S <sub>2</sub> )                                                                                                                                                                                                                 | C <sub>80</sub> H <sub>124</sub> Cu <sub>4</sub> N <sub>4</sub> O <sub>8</sub> S <sub>4</sub>                                                                                                                                                                                                                   |
| Formula weight                                                                                     | 1323.50                                                                                                                                                                                                                                                                                                          | 1652.22                                                                                                                                                                                                                                                                                                         |
| Temperature (K)                                                                                    | 293(2)                                                                                                                                                                                                                                                                                                           | 296(2)                                                                                                                                                                                                                                                                                                          |
| Wavelength (Å)                                                                                     | 0.71073                                                                                                                                                                                                                                                                                                          | 0.71073                                                                                                                                                                                                                                                                                                         |
| Crystal system                                                                                     | monoclinic, <i>I</i> <sub>2</sub>                                                                                                                                                                                                                                                                                | orthorhombic, <i>P</i> 2 <sub>1</sub> 2 <sub>1</sub> 2                                                                                                                                                                                                                                                          |
| <i>a</i> (Å)                                                                                       | 23.0626(7)                                                                                                                                                                                                                                                                                                       | 26.102(5)                                                                                                                                                                                                                                                                                                       |
| <i>b</i> (Å)                                                                                       | 13.2138(3)                                                                                                                                                                                                                                                                                                       | 11.779(2)                                                                                                                                                                                                                                                                                                       |
| <i>c</i> (Å)                                                                                       | 19.8116(8)                                                                                                                                                                                                                                                                                                       | 14.489(3)                                                                                                                                                                                                                                                                                                       |
| <i>α</i> (°)                                                                                       | 90                                                                                                                                                                                                                                                                                                               | 90                                                                                                                                                                                                                                                                                                              |
| <i>β</i> (°)                                                                                       | 105.730(4)                                                                                                                                                                                                                                                                                                       | 90                                                                                                                                                                                                                                                                                                              |
| <i>γ</i> (°)                                                                                       | 90                                                                                                                                                                                                                                                                                                               | 90                                                                                                                                                                                                                                                                                                              |
| <i>V</i> (Å <sup>3</sup> )                                                                         | 5811.4(3)                                                                                                                                                                                                                                                                                                        | 4454.7(16)                                                                                                                                                                                                                                                                                                      |
| <i>Z</i> , <i>D</i> <sub>Calcd</sub> (Mg.m <sup>-3</sup> )                                         | 4, 1.513                                                                                                                                                                                                                                                                                                         | 2, 1.232                                                                                                                                                                                                                                                                                                        |
| Abs. coefficient (mm <sup>-1</sup> )                                                               | 1.649                                                                                                                                                                                                                                                                                                            | 1.086                                                                                                                                                                                                                                                                                                           |
| <i>F</i> (000)                                                                                     | 2736                                                                                                                                                                                                                                                                                                             | 1752                                                                                                                                                                                                                                                                                                            |
| Limiting indices                                                                                   | -31 ≤ <i>h</i> ≤ 31<br>-18 ≤ <i>k</i> ≤ 16<br>-27 ≤ <i>l</i> ≤ 25                                                                                                                                                                                                                                                | -32 ≤ <i>h</i> ≤ 32<br>-14 ≤ <i>k</i> ≤ 12<br>-17 ≤ <i>l</i> ≤ 17                                                                                                                                                                                                                                               |
| Θ measurement and refinement (°)                                                                   | 3.8550~26.0870; θ <sub>max</sub> = 29.166, θ <sub>min</sub> = 3.366                                                                                                                                                                                                                                              | 2.228~24.033; θ <sub>max</sub> = 26.386, θ <sub>min</sub> = 1.405                                                                                                                                                                                                                                               |
| Reflections collected                                                                              | 21873                                                                                                                                                                                                                                                                                                            | 33587                                                                                                                                                                                                                                                                                                           |
| Independent reflections                                                                            | 12555( <i>R</i> <sub>int</sub> = 0.0263)                                                                                                                                                                                                                                                                         | 9077( <i>R</i> <sub>int</sub> = 0.0324)                                                                                                                                                                                                                                                                         |
| Observed data                                                                                      | 8062( <i>I</i> > 2σ( <i>I</i> ))                                                                                                                                                                                                                                                                                 | 7546 ( <i>I</i> > 2σ( <i>I</i> ))                                                                                                                                                                                                                                                                               |
| Refinement method                                                                                  | Full-matrix least-squares on F <sup>2</sup>                                                                                                                                                                                                                                                                      | Full-matrix least-squares on F <sup>2</sup>                                                                                                                                                                                                                                                                     |
| <i>N</i> <sub>ref</sub> / <i>N</i> <sub>par</sub> / <i>N</i> <sub>res</sub>                        | 12555/726/92                                                                                                                                                                                                                                                                                                     | 9077/497/86                                                                                                                                                                                                                                                                                                     |
| Flack parameter *                                                                                  | 0.010(10)                                                                                                                                                                                                                                                                                                        | 0.005(5)                                                                                                                                                                                                                                                                                                        |
| Final <i>R</i> <sub>1</sub> , <i>R</i> <sub>2</sub> , <i>Goodness</i> [ <i>I</i> > 2σ( <i>I</i> )] | <i>R</i> <sub>1</sub> = 0.0522, <i>R</i> <sub>2</sub> = 0.1064, <i>Goodness</i> = 1.027<br>= 1/[σ <sup>2</sup> ( <i>F</i> <sub>o</sub> <sup>2</sup> ) + (0.0410 <i>P</i> ) <sup>2</sup> + 12.9435 <i>P</i> ]<br>Where <i>P</i> = ( <i>F</i> <sub>o</sub> <sup>2</sup> + 2 <i>F</i> <sub>c</sub> <sup>2</sup> )/3 | <i>R</i> <sub>1</sub> = 0.0466, <i>R</i> <sub>2</sub> = 0.1233, <i>Goodness</i> = 1.058<br>= 1/[σ <sup>2</sup> ( <i>F</i> <sub>o</sub> <sup>2</sup> ) + (0.0878 <i>P</i> ) <sup>2</sup> + 0.7380 <i>P</i> ]<br>where <i>P</i> = ( <i>F</i> <sub>o</sub> <sup>2</sup> + 2 <i>F</i> <sub>c</sub> <sup>2</sup> )/3 |
| Final <i>R</i> <sub>1</sub> , <i>R</i> <sub>2</sub> , <i>S</i> (all data)                          | <i>R</i> <sub>1</sub> = 0.0974, <i>R</i> <sub>2</sub> = 0.1323, <i>S</i> = 1.030                                                                                                                                                                                                                                 | <i>R</i> <sub>1</sub> = 0.0599, <i>R</i> <sub>2</sub> = 0.1370, <i>S</i> = 1.087                                                                                                                                                                                                                                |
| (Δ/σ) <sub>max</sub>                                                                               | 0.001                                                                                                                                                                                                                                                                                                            | 0.001                                                                                                                                                                                                                                                                                                           |

\* For TNCu-A and TNCu-B: Parsons, Flack and Wagner, Acta Cryst. B69 (2013) 249-259.

Table S2. Selected bond distances (Å) and angles (°) for complexes TNCu-A.

| Bond                           | Dist. (Å)  | Bond                      | Dist. (Å)  | Bond                             | Dist. (Å)  |
|--------------------------------|------------|---------------------------|------------|----------------------------------|------------|
| Cu(1)—O(2)                     | 1.908 (9)  | Cu(2)—O(3)                | 1.958 (8)  | Cu(4)—O(9)                       | 1.966 (7)  |
| Cu(1)—O(3)                     | 1.949 (8)  | Cu(2)—O(5)                | 1.897 (6)  | Cu(4)—O(11)                      | 1.887 (8)  |
| Cu(1)—O(6) <sup>i</sup>        | 1.960 (8)  | Cu(2)—O(6)                | 1.961 (7)  | Cu(4)—O(12)                      | 1.951 (7)  |
| Cu(1)—N(1)                     | 1.925 (9)  | Cu(2)—N(2)                | 1.930 (10) | Cu(4)—N(4)                       | 1.956(9)   |
| Cu(3)—O(9)                     | 1.945 (6)  | Cu(3)—O(12) <sup>ii</sup> | 1.937(8)   | S(3)—C(38)                       | 1.86 (3)   |
| Cu(3)—O(8)                     | 1.879(6)   | Cu(3)—N(3)                | 1.923 (9)  | S(3A)—C(38A)                     | 1.897 (16) |
| S(1)—C(12)                     | 1.821 (17) | S(2)—C(26)                | 1.721 (7)  | S(4)—C(51)                       | 1.779(15)  |
| S(1)—C(13)                     | 1.785 (19) | S(2A)—C(26A)              | 1.927 (15) | S(4A)—C(51A)                     | 1.81(3)    |
| Angle                          | (°)        | Angle                     | (°)        | Angle                            | (°)        |
| N(1)—Cu(1)—O(3)                | 83.6 (4)   | O(5)—Cu(2)—O(3)           | 95.2(3)    | N(3)—Cu(3)—O(12) <sup>ii</sup>   | 166.9(3)   |
| O(3)—Cu(1)—O(6) <sup>i</sup>   | 86.8(4)    | O(5)—Cu(2)—N(2)           | 93.4 (4)   | O(8)—Cu(3)—O(9)                  | 178.4(4)   |
| O(2)—Cu(1)—N(1)                | 93.6(4)    | O(3)—Cu(2)—O(6)           | 86.9(3)    | N(3)—Cu(3)—O(9)                  | 83.8 (3)   |
| O(2)—Cu(1)—O(6) <sup>i</sup>   | 95.7(4)    | N(2)—Cu(2)—O(6)           | 84.7 (4)   | O(8)—Cu(3)—N(3)                  | 94.9 (3)   |
| O(2)—Cu(1)—O(3)                | 177.0 (4)  | O(5)—Cu(2)—O(6)           | 177.8(4)   | O(8)—Cu(3)—O(12) <sup>ii</sup>   | 93.7 (3)   |
| N(1)—Cu(1)—O(6) <sup>i</sup>   | 167.2 (4)  | N(2)—Cu(2)—O(3)           | 165.0(5)   | O(12) <sup>ii</sup> —Cu(3)—O(9)  | 87.8(3)    |
| O(11)—Cu(4)—O(9)               | 95.8 (4)   | O(12)—Cu(4)—N(4)          | 83.7 (4)   | Cu(3)—O(9)—Cu(4)                 | 112.6(4)   |
| O(11)—Cu(4)—N(4)               | 93.1(4)    | O(11)—Cu(4)—O(12)         | 176.7 (4)  | Cu(3) <sup>ii</sup> —O(12)—Cu(4) | 107.6(4)   |
| O(12)—Cu(4)—O(9)               | 87.2(3)    | N(4)—Cu(4)—O(9)           | 166.4 (4)  | C(39)—S(3)—C(38)                 | 123.0(16)  |
| Cu(1) <sup>i</sup> —O(6)—Cu(2) | 106.7(4)   | Cu(1)—O(3)—Cu(2)          | 111.8(4)   | C(52)—S(4)—C(51)                 | 98.4(12)   |
| C(13)—S(1)—C(12)               | 102.6(10)  | C(26)—S(2)—C(25)          | 104.8(10)  | C(52A)—S(4A)—C(51A)              | 122(4)     |

Symmetry code: (i)  $-x+1, y, -z+1$ ; (ii)  $-x+1, y, -z$ .

Table S3. Selected bond distances (Å) and angles (°) for complexes TNCu-B.

| Bond                          | Dist. (Å) | Bond                           | Dist. (Å)  | Bond            | Dist. (Å)  |
|-------------------------------|-----------|--------------------------------|------------|-----------------|------------|
| Cu(1)—O(1)                    | 1.949 (4) | Cu(2)—O(3)                     | 1.952(4)   | S(2)—C(25A)     | 1.81(2)    |
| Cu(1)—O(3) <sup>i</sup>       | 1.945(3)  | Cu(2)—O(4)                     | 1.891(4)   | S(2A)—C(25)     | 1.992(17)  |
| Cu(1)—O(2)                    | 1.900(4)  | Cu(2)—N(2)                     | 1.934(4)   | C(24)—S(2)      | 1.905(16)  |
| Cu(1)—N(1)                    | 1.925(4)  | Cu(2)—O(1)                     | 1.951(4)   | C(24A)—S(2A)    | 1.817(17)  |
| S(1)—C(2)                     | 1.760(18) | C(1)—S(1A)                     | 1.716(19)  |                 |            |
| S(1)—C(1A)                    | 1.75(6)   | C(2A)—S(1A)                    | 1.98(4)    |                 |            |
| Angle                         | (°)       | Angle                          | (°)        | Angle           | (°)        |
| O(2)—Cu(1)—O(3) <sup>i</sup>  | 95.81(16) | N(1)—Cu(1)—O(3) <sup>i</sup>   | 168.34(18) | O(4)—Cu(2)—O(3) | 175.66(16) |
| O(2)—Cu(1)—N(1)               | 93.53(17) | Cu(1) <sup>i</sup> —O(3)—Cu(2) | 108.05(17) | O(4)—Cu(2)—N(2) | 93.24(17)  |
| O(3) <sup>i</sup> —Cu(1)—O(1) | 87.27(16) | Cu(1)—O(1)—Cu(2)               | 116.06(19) | O(4)—Cu(2)—O(1) | 95.75(17)  |

|                 |            |                  |            |                 |           |
|-----------------|------------|------------------|------------|-----------------|-----------|
| N(1)—Cu(1)—O(1) | 83.51(18)  | N(2)—Cu(2)—O(1)  | 165.93(19) | N(2)—Cu(2)—O(3) | 82.85(16) |
| O(2)—Cu(1)—O(1) | 176.79(16) | C(1)—S(1A)—C(2A) | 97.5(16)   | O(1)—Cu(2)—O(3) | 88.45(16) |

Symmetry code: (i)  $-x+1, -y+1, z$ .

Table S4. Hydrogen bond lengths (Å) and angles (°) for complexes TNCu-A and TNCu-B.

| TNCu-A                             |             |               |                       |              |
|------------------------------------|-------------|---------------|-----------------------|--------------|
| <i>D</i> —H... <i>A</i>            | <i>D</i> —H | H... <i>A</i> | <i>D</i> ... <i>A</i> | < <i>DHA</i> |
| C(8)—H(8B)...S(2A) <sup>iii</sup>  | 0.96        | 2.80          | 3.74(3)               | 166.4        |
| C(8)—H(8C)...O(2)                  | 0.96        | 2.51          | 3.06(2)               | 116.6        |
| C(10)—H(10)...S(1)                 | 0.98        | 2.84          | 3.356(12)             | 113.4        |
| C(24A)—H(24D)...N(2) <sup>i</sup>  | 0.97        | 2.26          | 3.19(4)               | 161.1        |
| C(11)—H(11B)...O(10)               | 0.97        | 2.39          | 3.221(13)             | 143.7        |
| C(36)—H(37)...S(3)                 | 0.98        | 2.83          | 3.32(3)               | 112.1        |
| C(37)—H(37A)...S(4) <sup>v</sup>   | 0.97        | 2.79          | 3.729(11)             | 162.3        |
| C(47)—H(47A)...O(11)               | 0.96        | 2.47          | 2.969(17)             | 111.9        |
| C(51)—H(51A)...O(1) <sup>vi</sup>  | 0.97        | 2.42          | 3.39(2)               | 173.3        |
| C(12)—H(12B)...S(2) <sup>iv</sup>  | 0.97        | 2.73          | 3.396(18)             | 126.4        |
| C(48)—H(48A)...O(8) <sup>ii</sup>  | 0.97        | 2.47          | 2.987(15)             | 112.8        |
| TNCu-B                             |             |               |                       |              |
| <i>D</i> —H... <i>A</i>            | <i>D</i> —H | H... <i>A</i> | <i>D</i> ... <i>A</i> | < <i>DHA</i> |
| C(21)—H(21A)...O(2) <sup>i</sup>   | 0.97        | 2.60          | 3.129(7)              | 114.3        |
| C(5)—H(5BD)...O(4)                 | 0.97        | 2.62          | 3.214(8)              | 120.1        |
| C(24A)—H(24C)...S(2A) <sup>i</sup> | 0.97        | 2.25          | 3.101(19)             | 145.2        |

Symmetry codes:

For complex TNCu-A: (i)  $-x+1, y, -z+1$ ; (ii)  $-x+1, y, -z$ ; (iii)  $x+1/2, y+1/2, z+1/2$ ; (iv)  $-x+1, y+1, -z+1$ ; (v)  $-x+1, y+1, -z$ ; (vi)  $x, y, z-1$ .

For complex TNCu-B: (i)  $-x+1, -y+1, z$ .

## Supplementary Figures

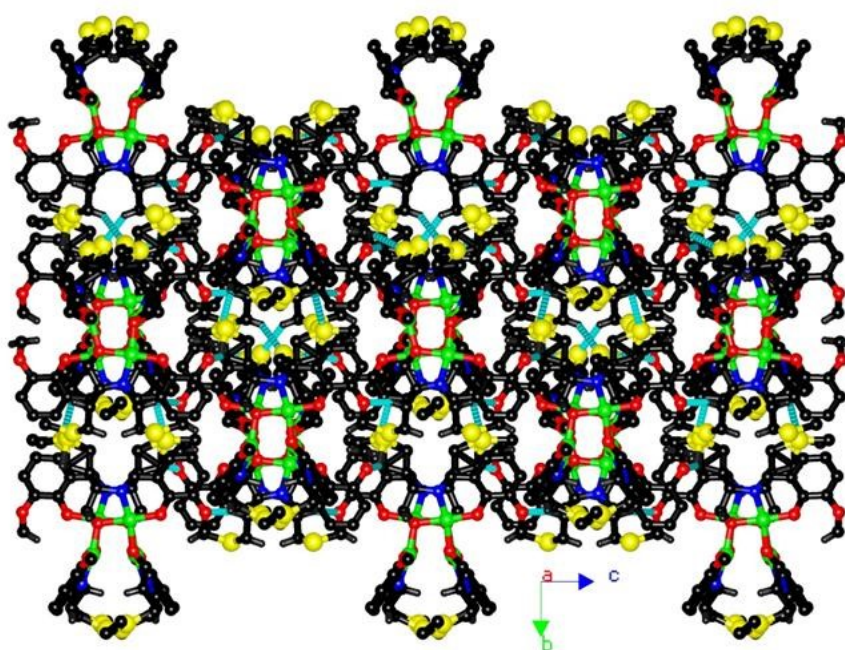

**Figure S1** The two-dimensional network structure of TNCu-A in the *bc* plane. The dotted lines in light blue indicate hydrogen bondings. Most of the hydrogen atoms bonded to carbon atoms were omitted for clarity.

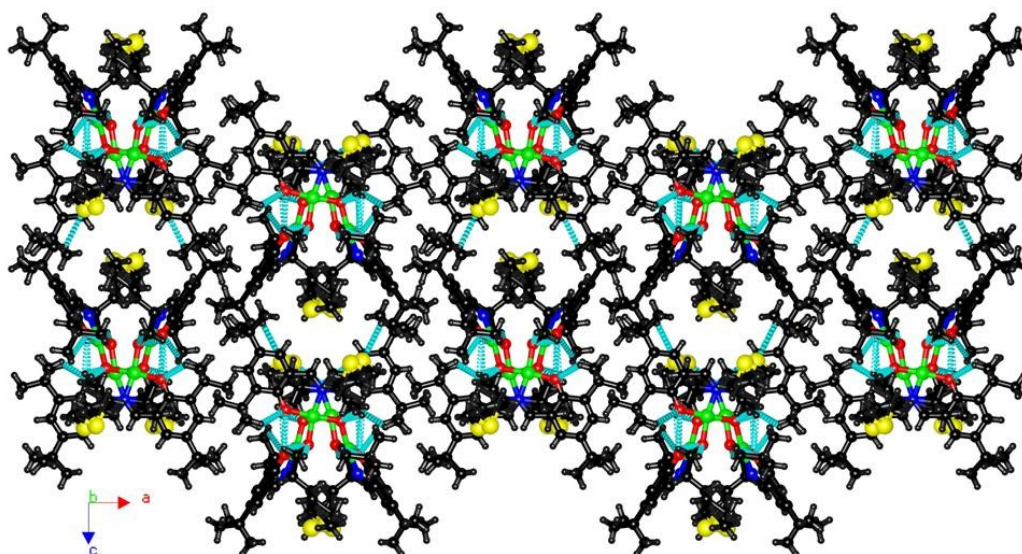

**Figure S2** The two-dimensional network structure of TNCu-B in the *ac* plane. The dotted lines in light blue indicate hydrogen bondings.

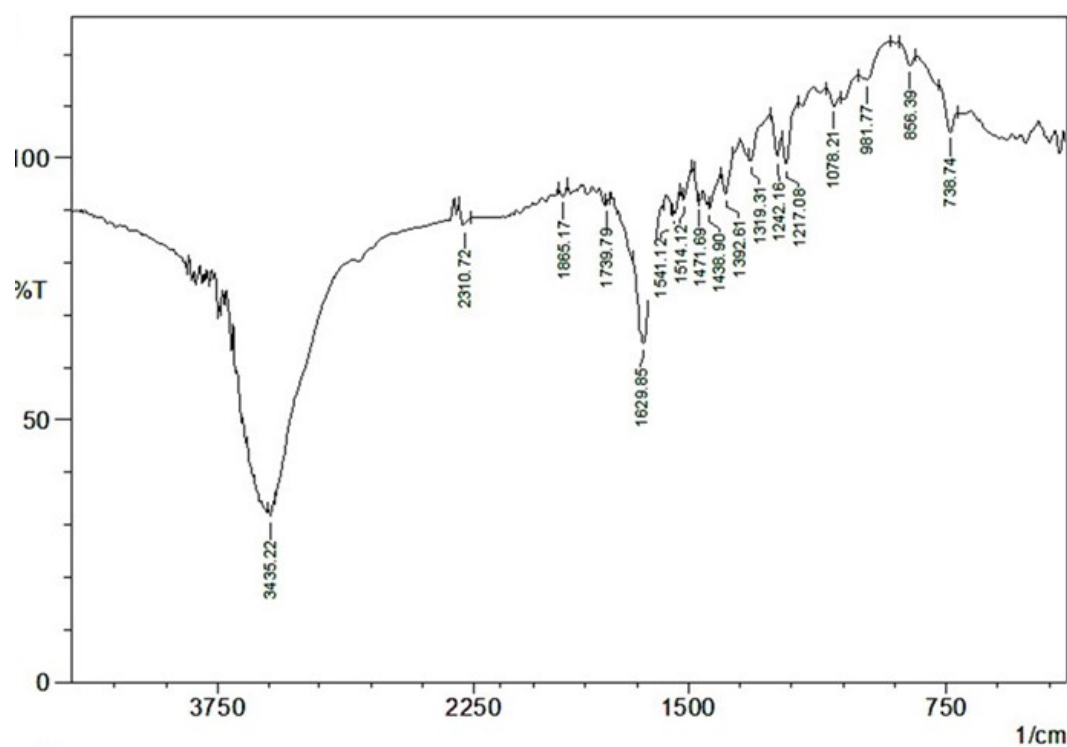

**Figure S3** FT-IR of  $\{[\text{Cu}_4(\text{C}_{13}\text{H}_{17}\text{O}_3\text{NS})_4]\}_2$  (abbreviated as TNCu-A), and  $\text{H}_2(\text{C}_{13}\text{H}_{17}\text{O}_3\text{NS}) = \text{C}_6\text{H}_3(\text{OH})(\text{OCH}_3)\text{CH}=\text{NCH}(\text{CH}_2\text{OH})(\text{CH}_2\text{CH}_2\text{SCH}_3)$ .

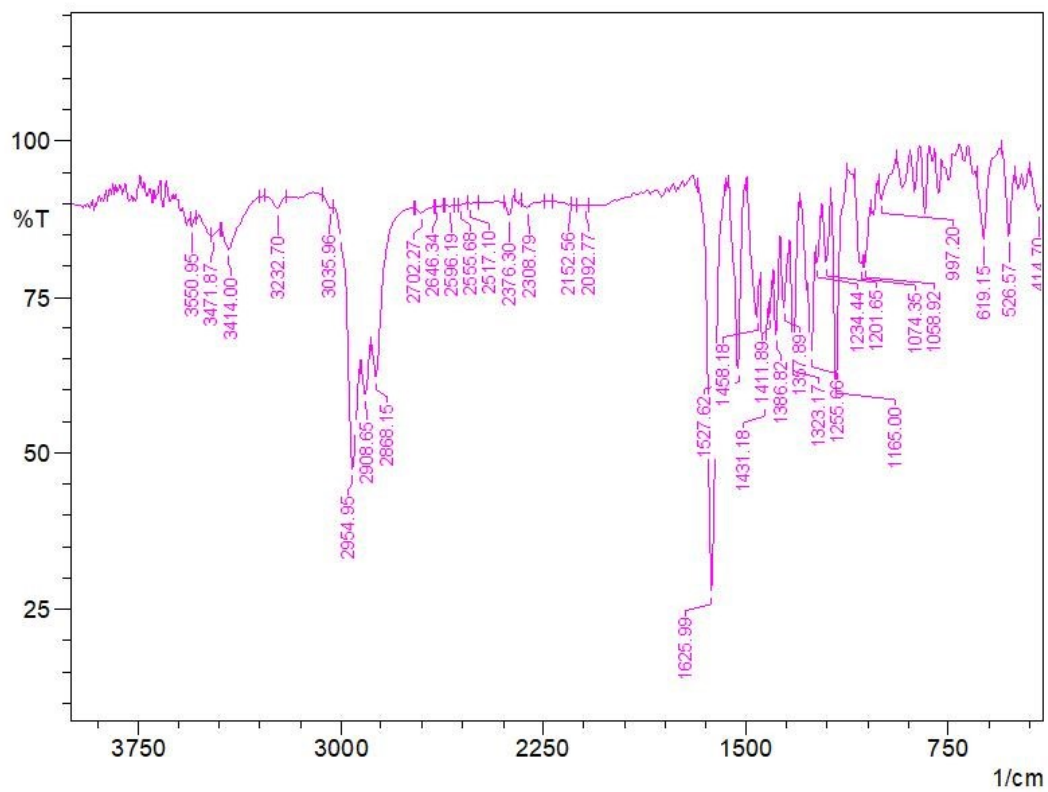

**Figure S4** FT-IR of  $[\text{Cu}_4(\text{C}_{20}\text{H}_{31}\text{O}_2\text{NS})_4]$ , (abbreviated as TNCu-B, and  $\text{H}_2(\text{C}_{20}\text{H}_{31}\text{O}_2\text{NS}) = \text{C}_6\text{H}_2(\text{C}(\text{CH}_3)_2(\text{OH})\text{CH}=\text{NCH}(\text{CH}_2\text{OH})(\text{CH}_2\text{CH}_2\text{SCH}_3)$ ).

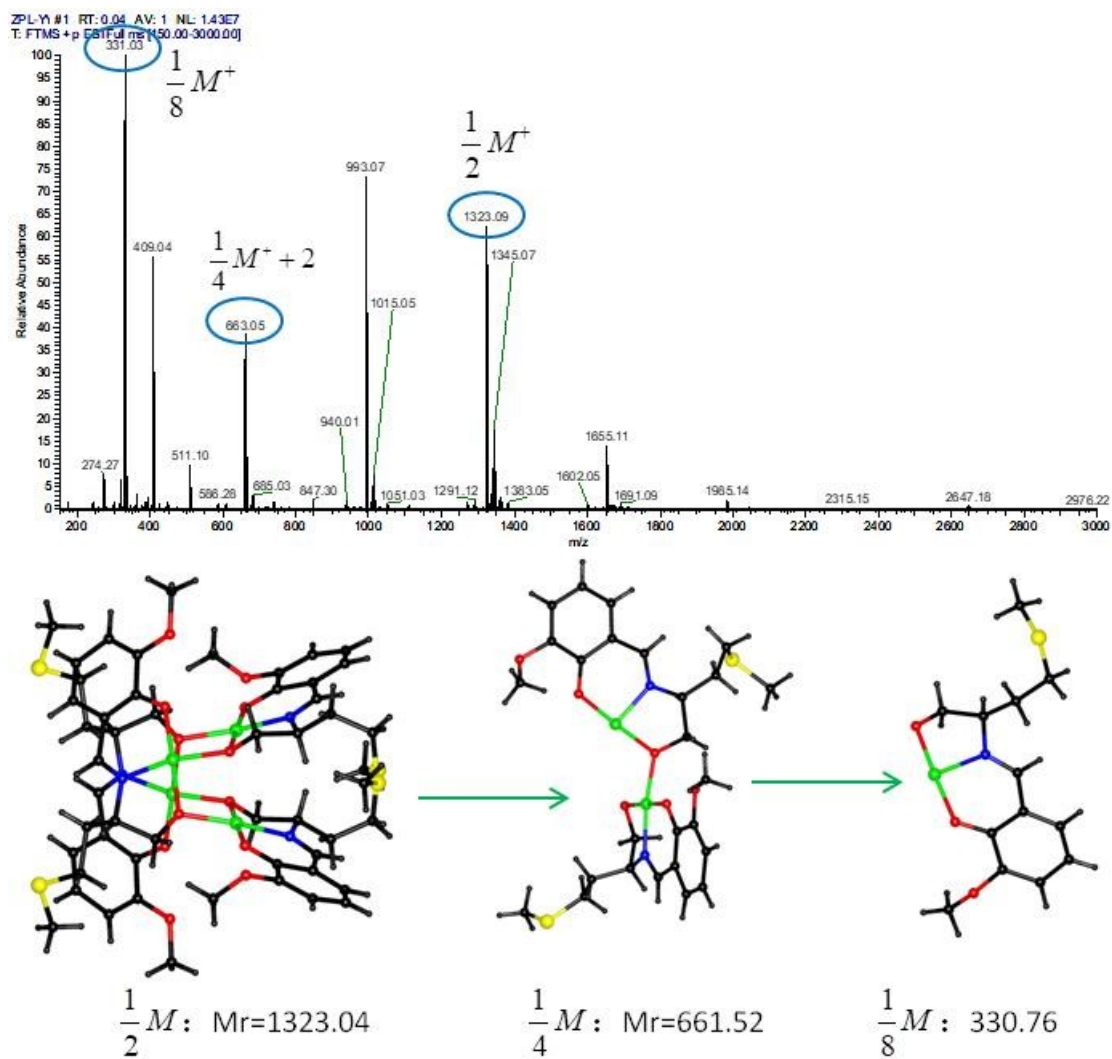

**Figure S5.** Liquid chromatography mass spectrometry of positive ion of  $\{[Cu_4(C_{13}H_{17}O_3NS)_4]\}_2$  (abbreviated as TNCu-A).
